# Supplementary material
Source: PubMed Central journal article supplement (PMC3627424)
Supplement: NIHMS441094-supplement-Supplementary_Data.pdf [file NIHMS441094-supplement-Supplementary_Data.pdf]

## Supporting Information

# Automated ARGET ATRP accelerates catalyst optimization for the synthesis of thiol-functionalized polymers

Daniel J. Siegwart,<sup>1,2,#</sup> Matthias Leiencker,<sup>1,2,#</sup> Robert Langer,<sup>1,2,3</sup> and Daniel G. Anderson<sup>1,2,3\*</sup>

<sup>1</sup> Department of Chemical Engineering, Massachusetts Institute of Technology, Cambridge, MA, 02139

<sup>2</sup> David H. Koch Institute for Integrative Cancer Research, Massachusetts Institute of Technology, Cambridge, MA, 02139

<sup>3</sup> Harvard-MIT Division of Health Sciences and Technology, Cambridge, MA, 02139

# These authors contributed equally.

\* To whom correspondence should be addressed: [dgander@mit.edu](mailto:dgander@mit.edu)

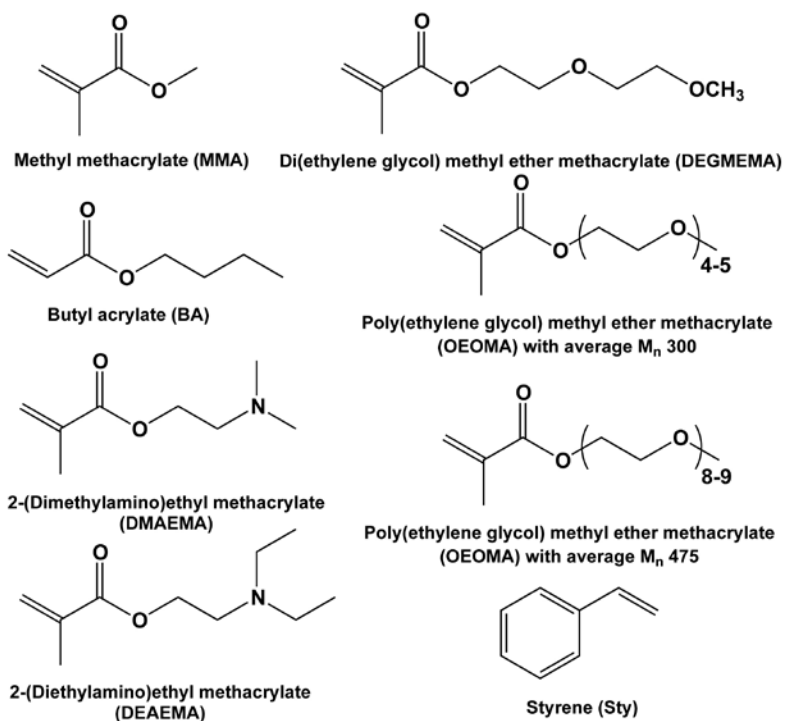

**Figure S1.** Monomers polymerized by ARGET ATRP in this study.

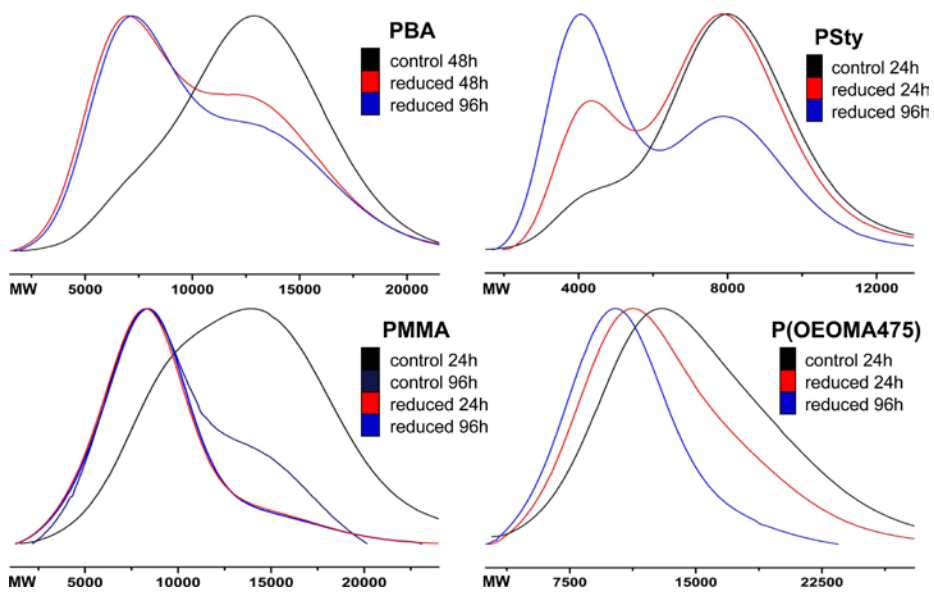

**Figure S2.** GPC traces showing cleavage of the disulfide bond by DTT in THF at 50°C and reduction in MW. The black line shows control (THF, 50° C, without DTT).
